# Supplementary material
Source: HighWire-hosted journal article supplement (https://www.cancerbiomed.org/content/21/1/83)
Supplement: media-1 [file media-1.pdf]

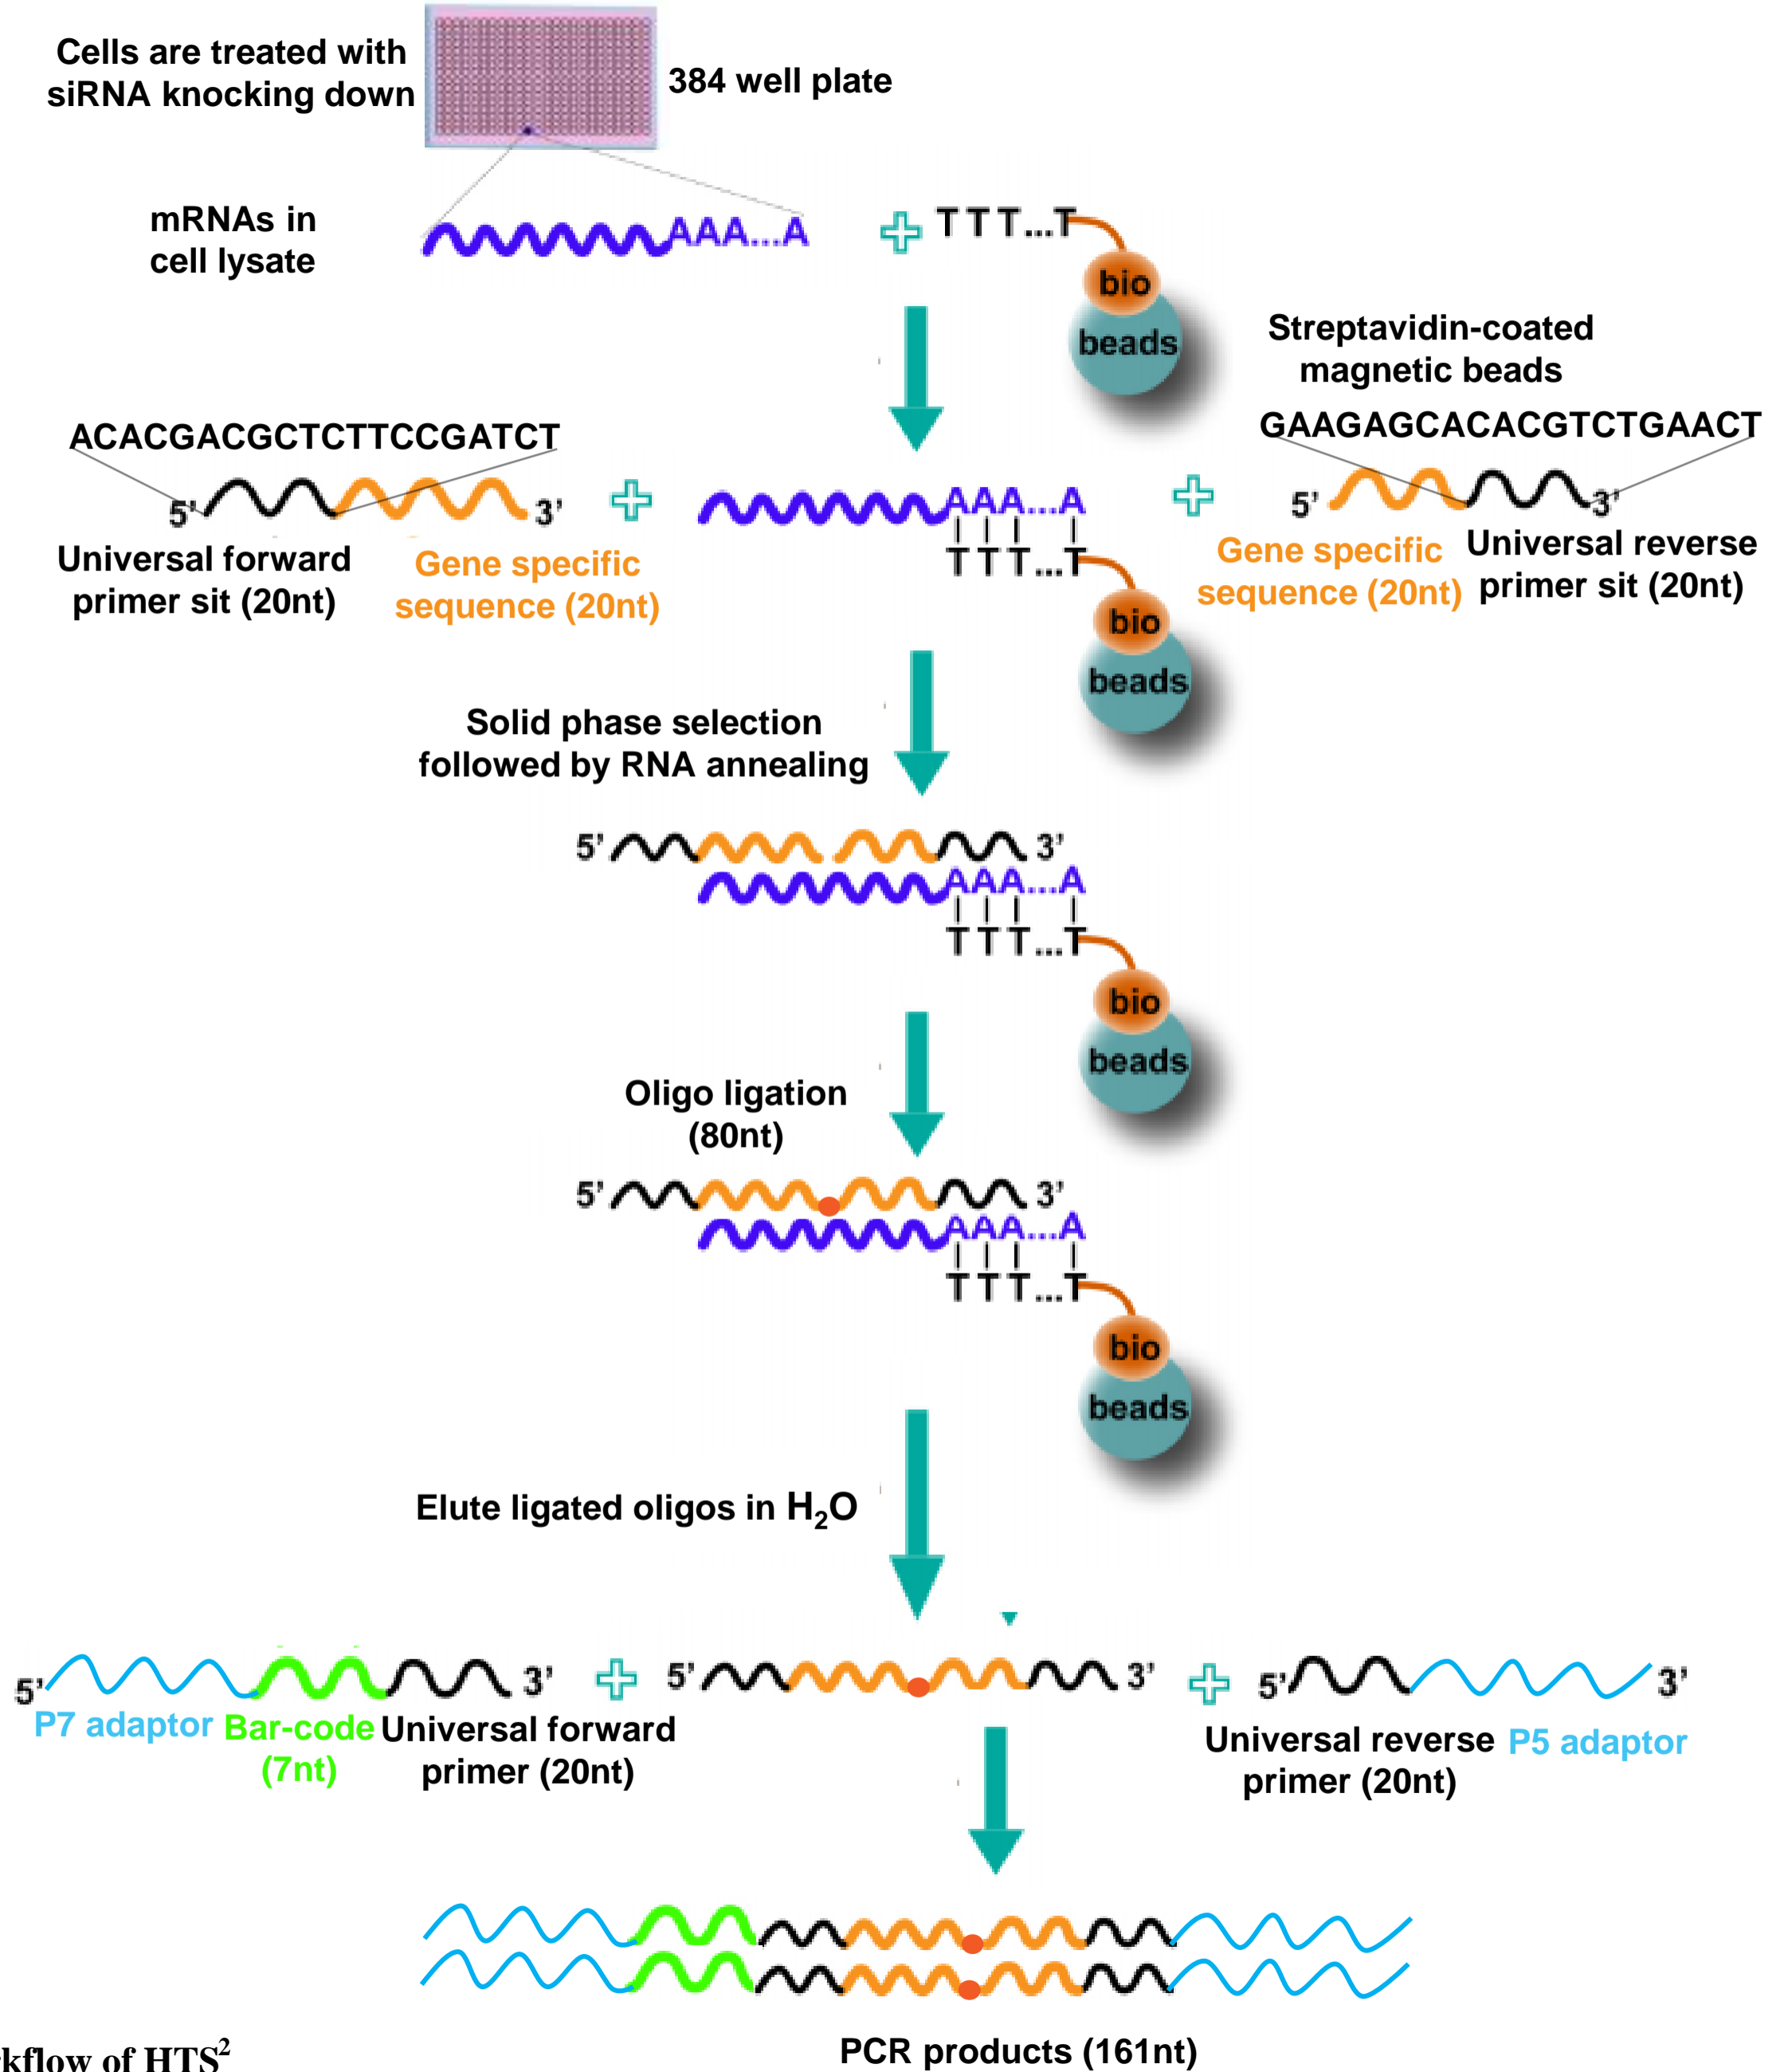

Figure S1. The workflow of HTS<sup>2</sup>

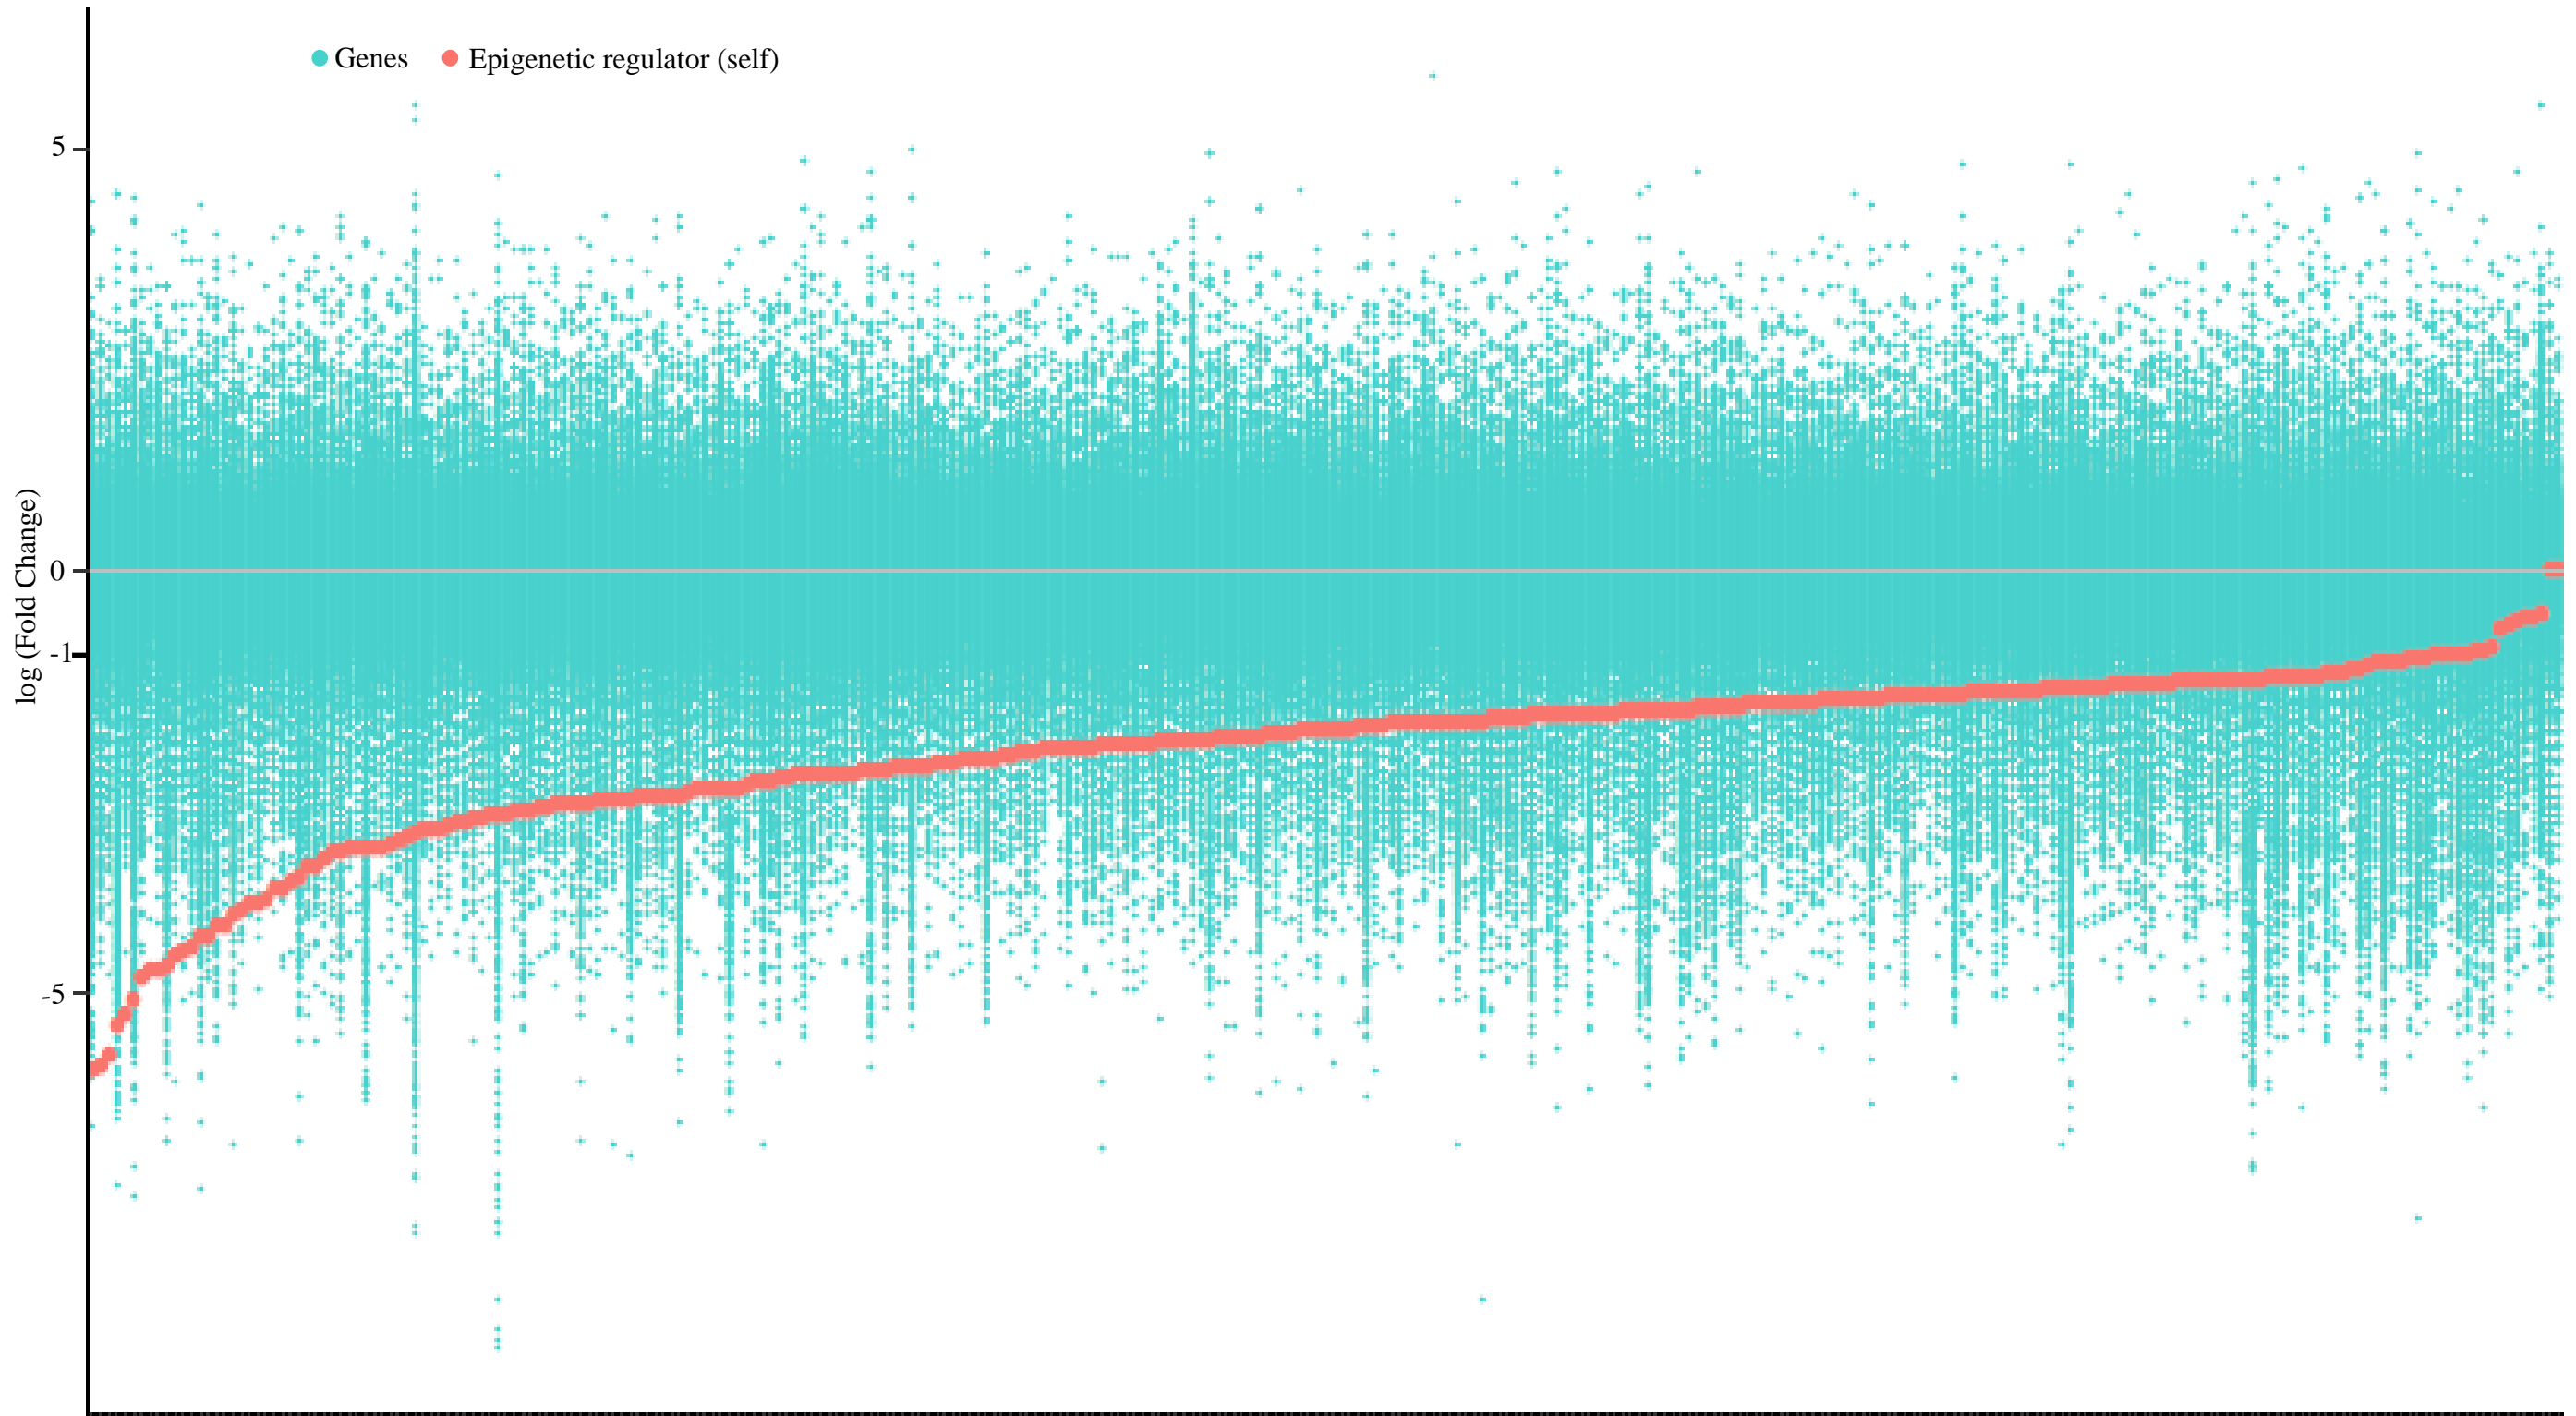

Epigenetic regulator knocking down

**Figuer S2. Log(fold change) of gene after epigenetic regulator knocking down.** The x axis is the epigenetic regulator knocking down. The y axis is the log(fold change) of gene after epigenetic regulators knocking down. The red node represents the knocking down epigenetic regulator. The green node represents another 2,985 genes.

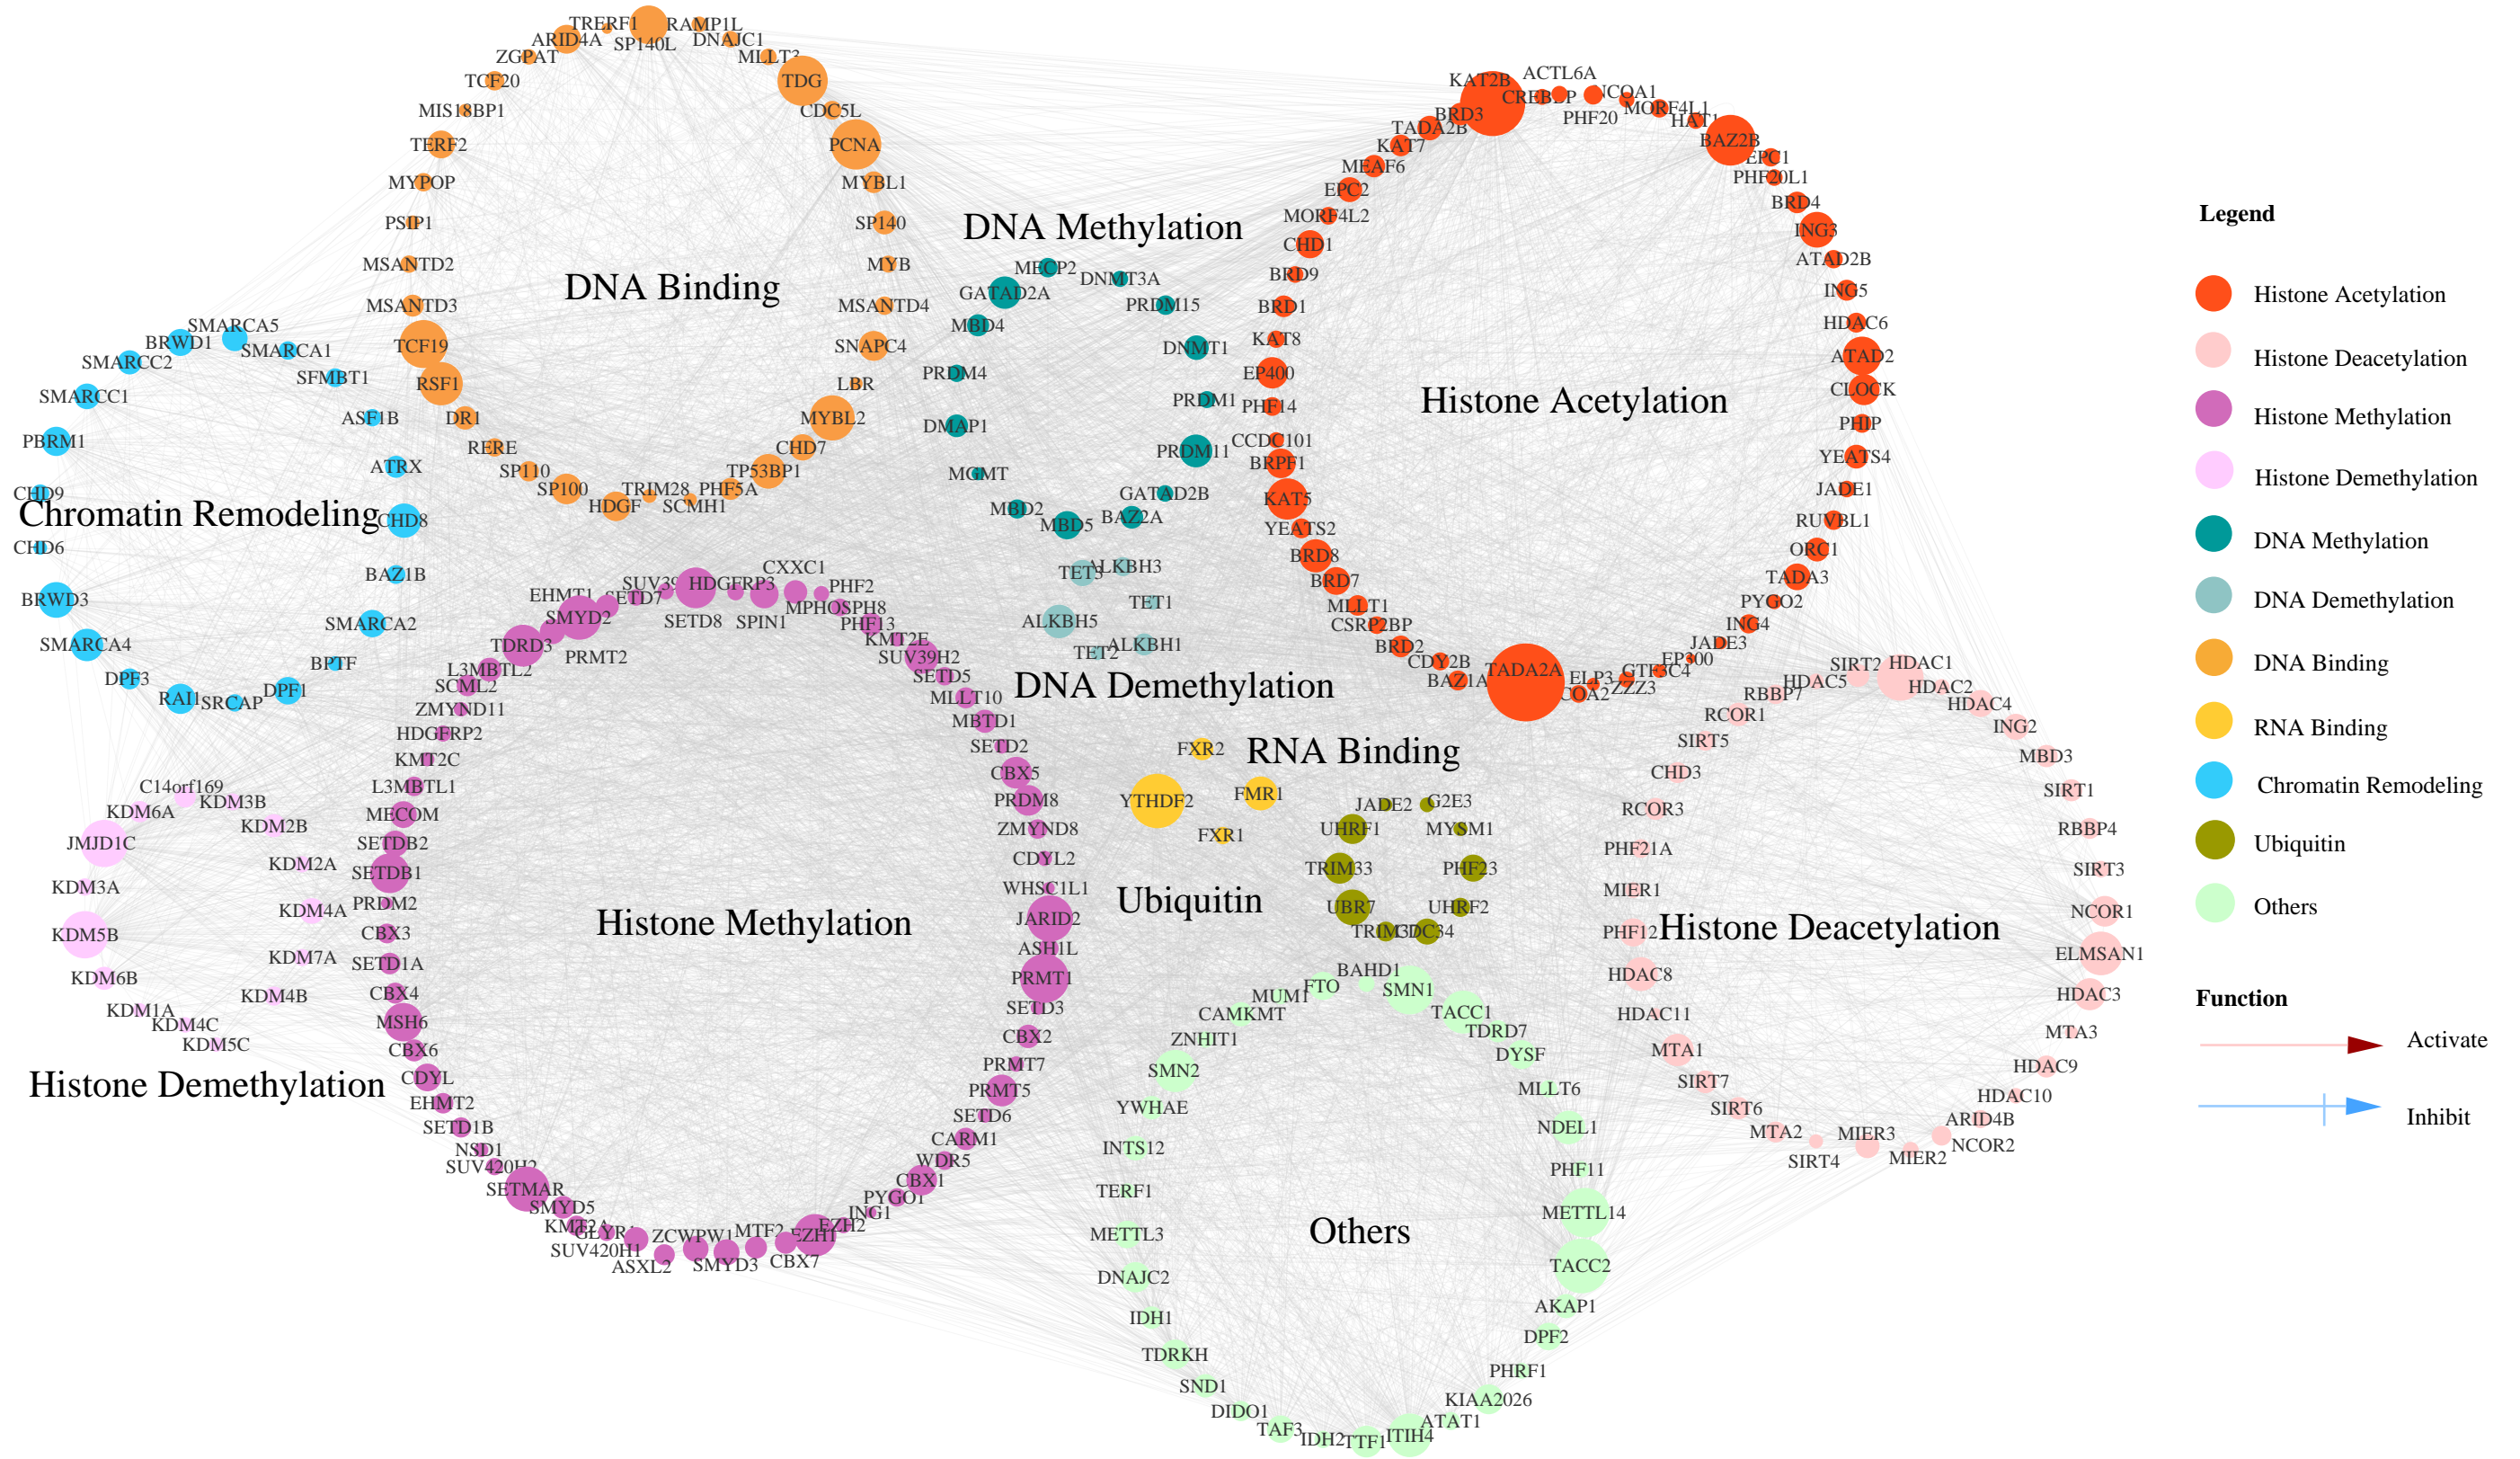

**Figure S3. The regulatory network of 299 epigenetic regulators.** Each node represents an epigenetic regulator and different color represents different function. The edge represents a regulatory interaction between two epigenetic regulators. The red arrow means activation, and the blue cross delta means inhibition.

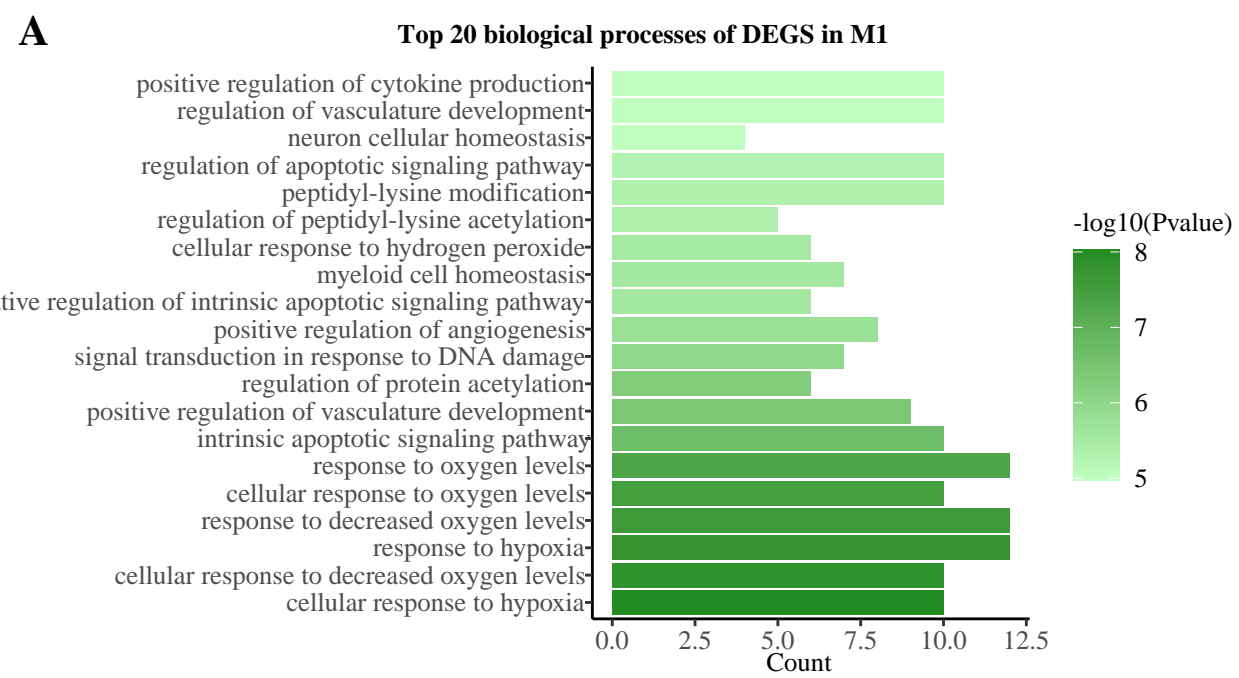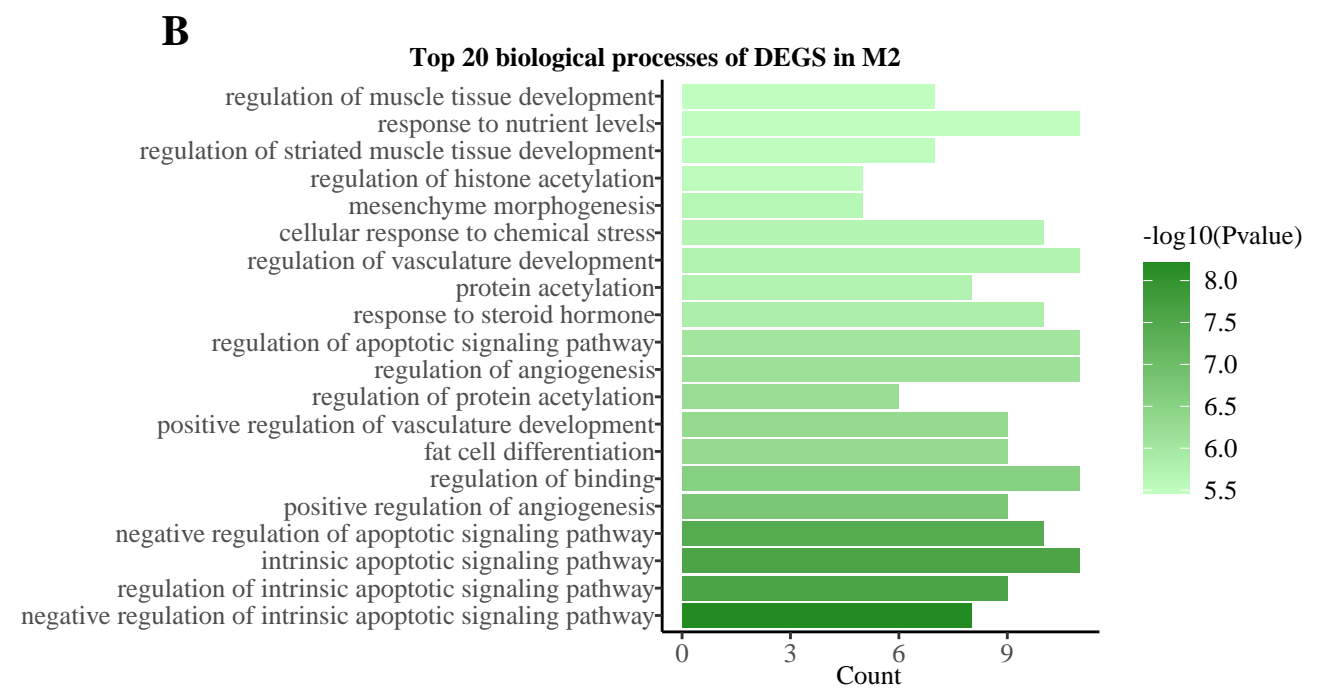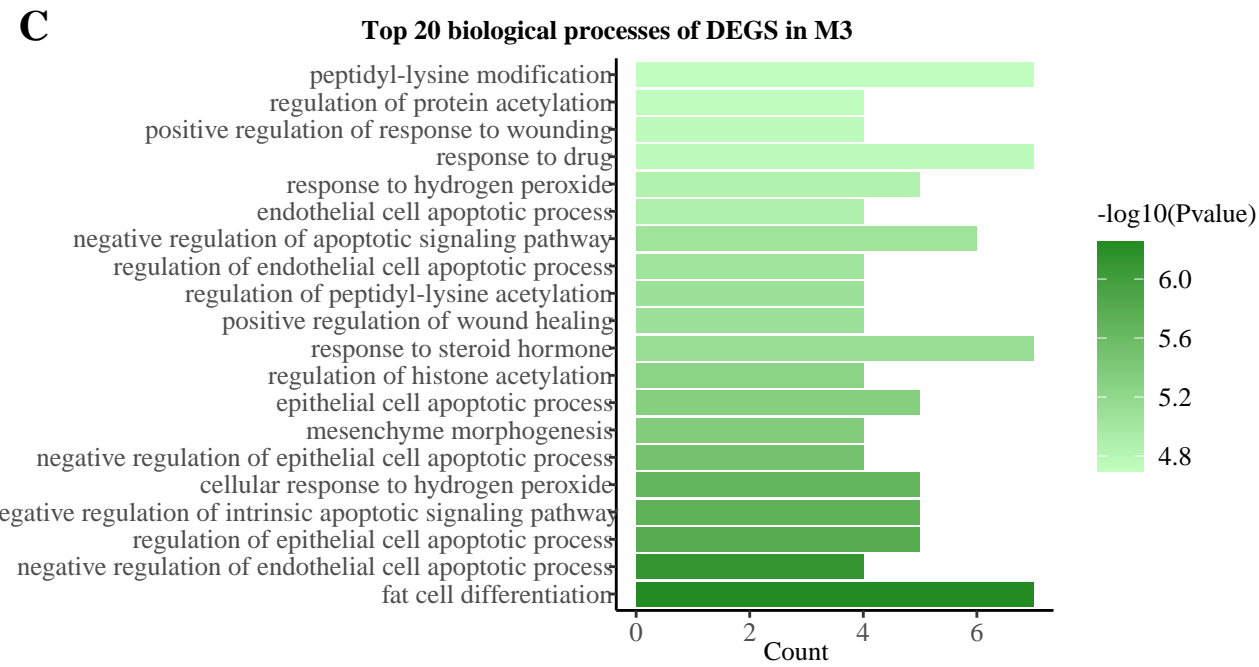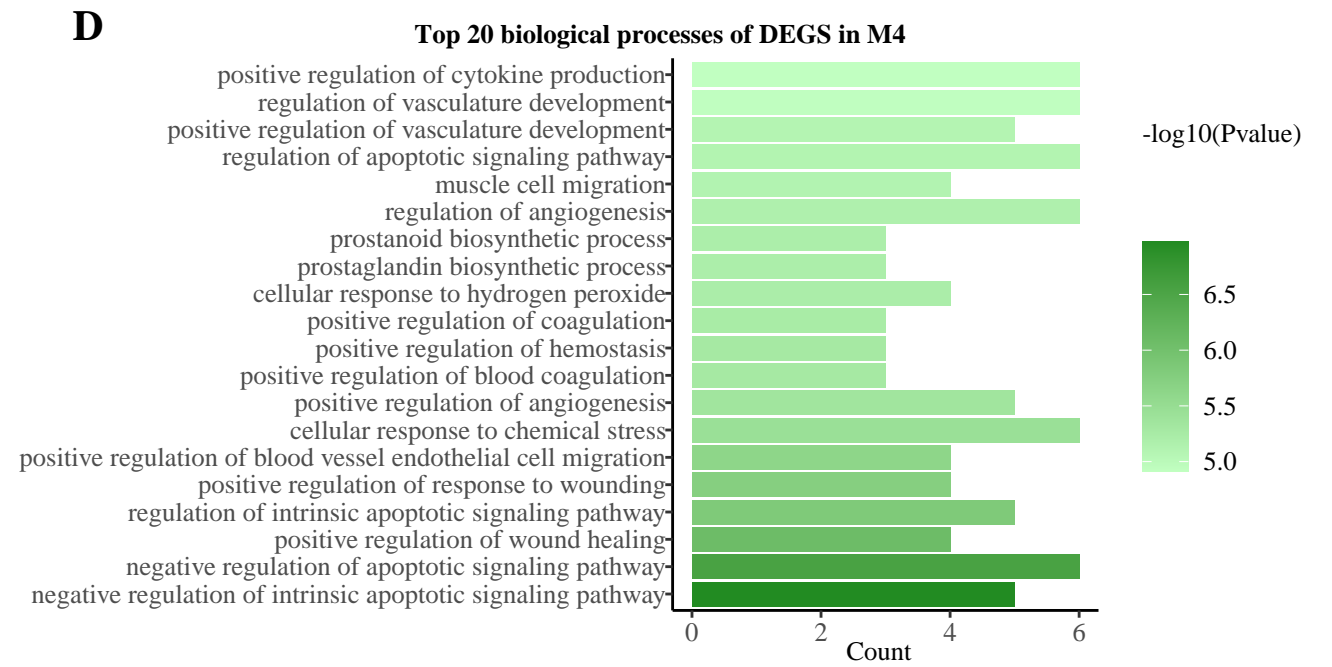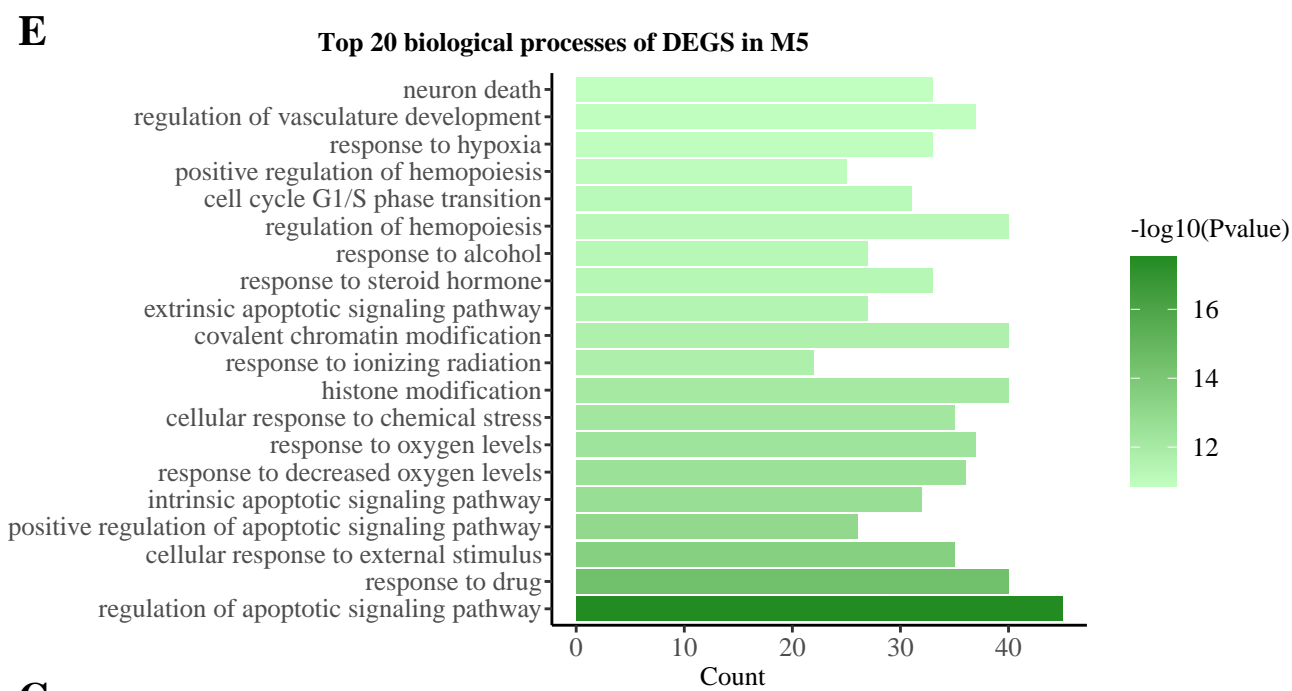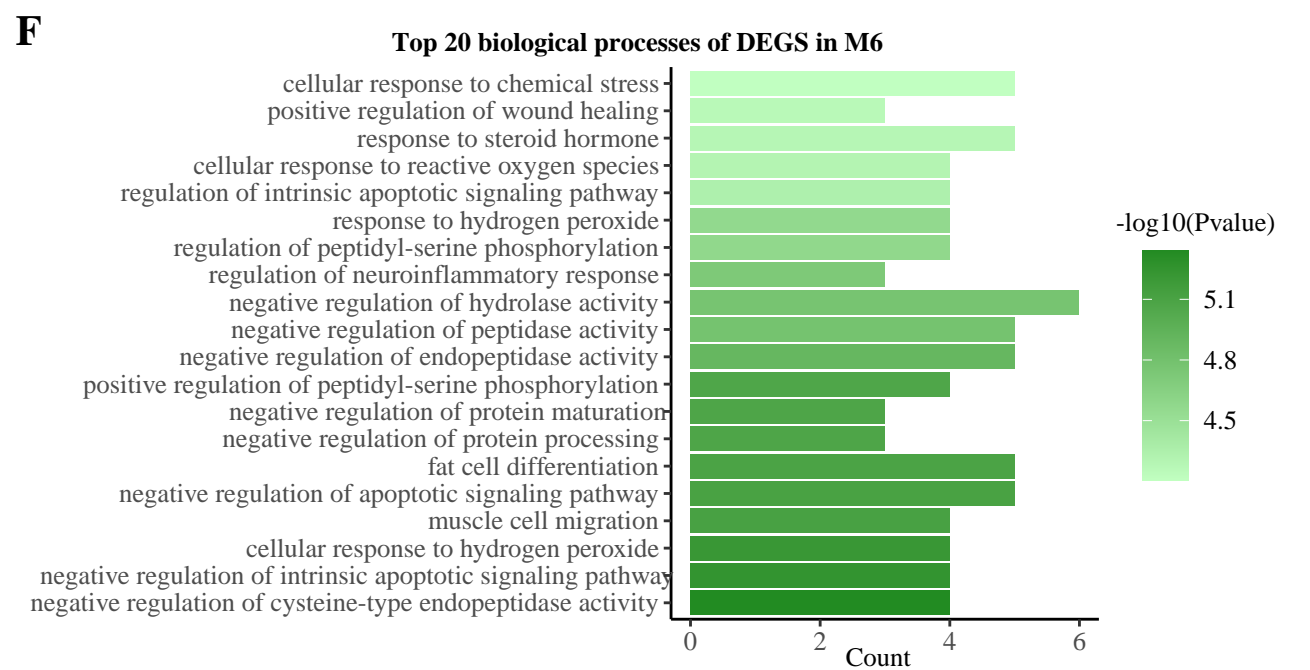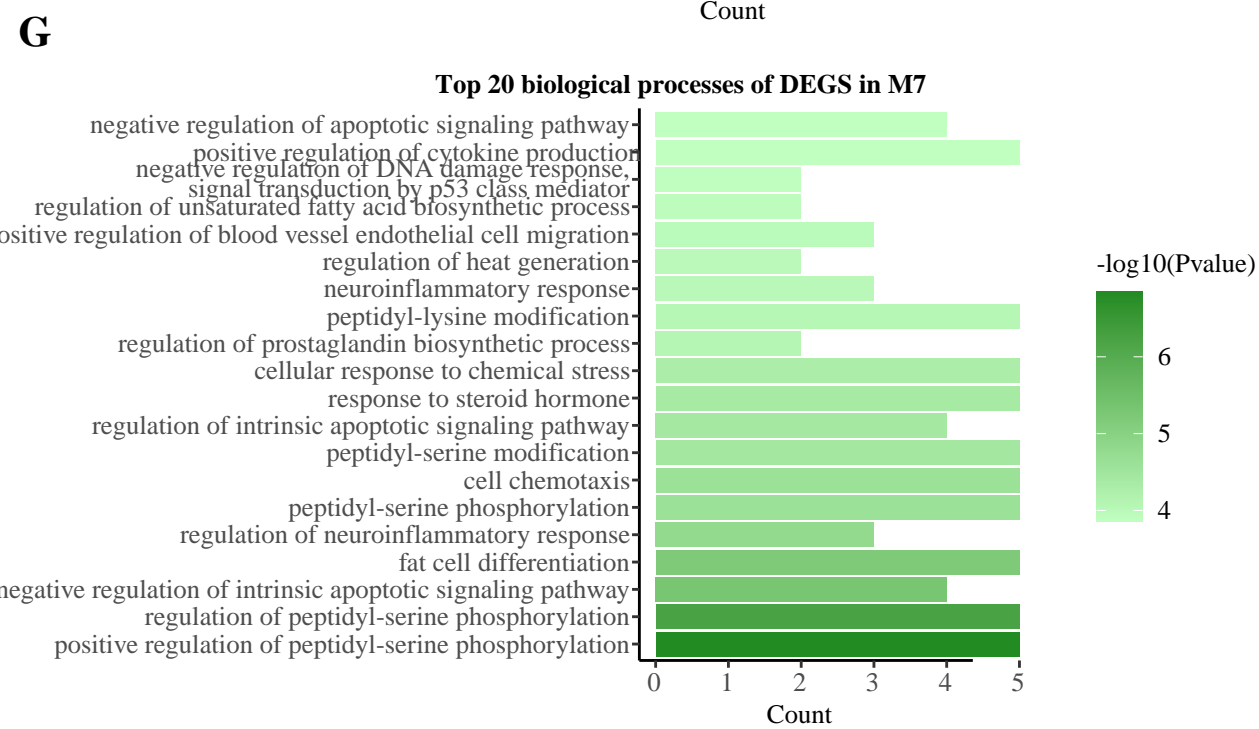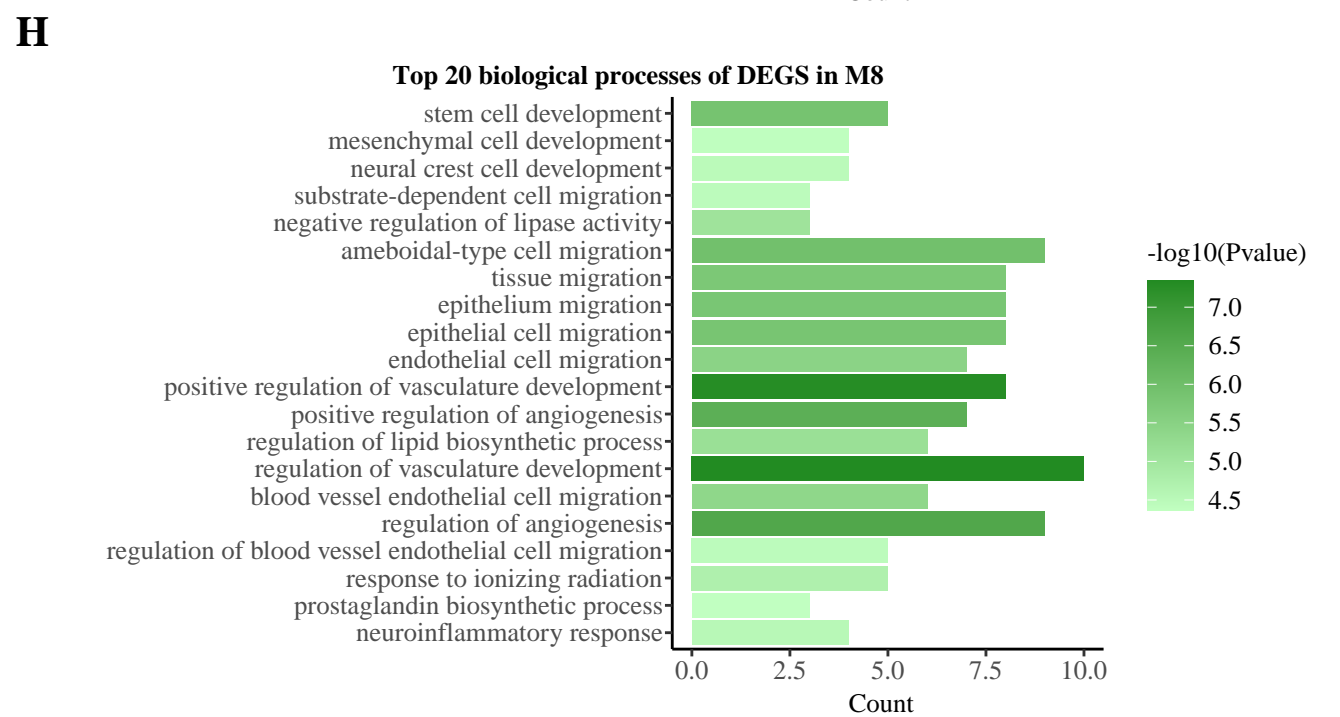

**Figure S4. The functions of 8 modules.** (A-H) The top 20 biological process term enriched by the DEGs regulated by 8 modules, respectively.

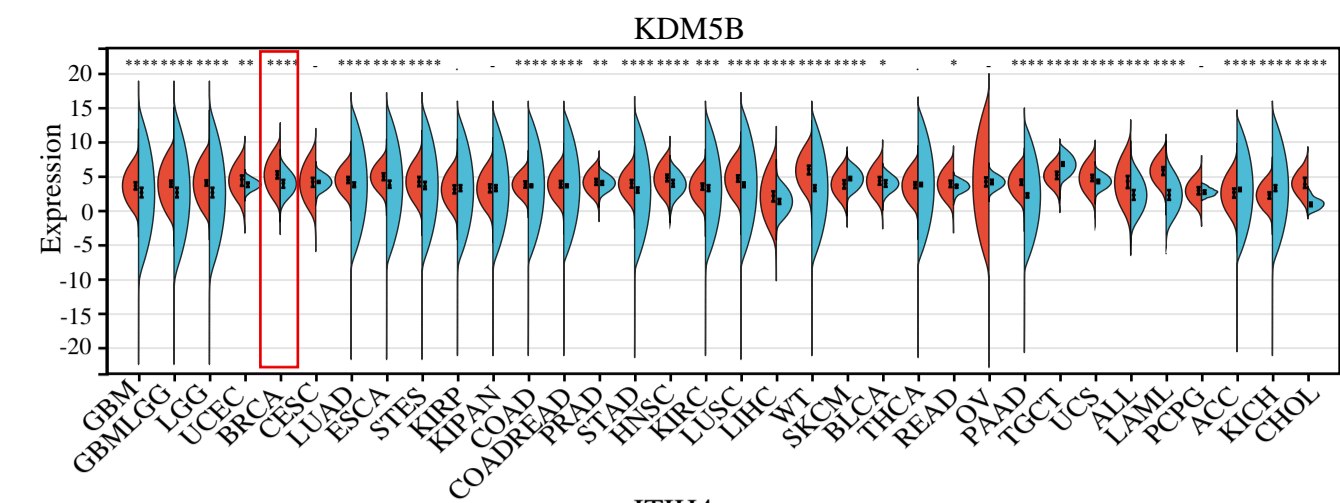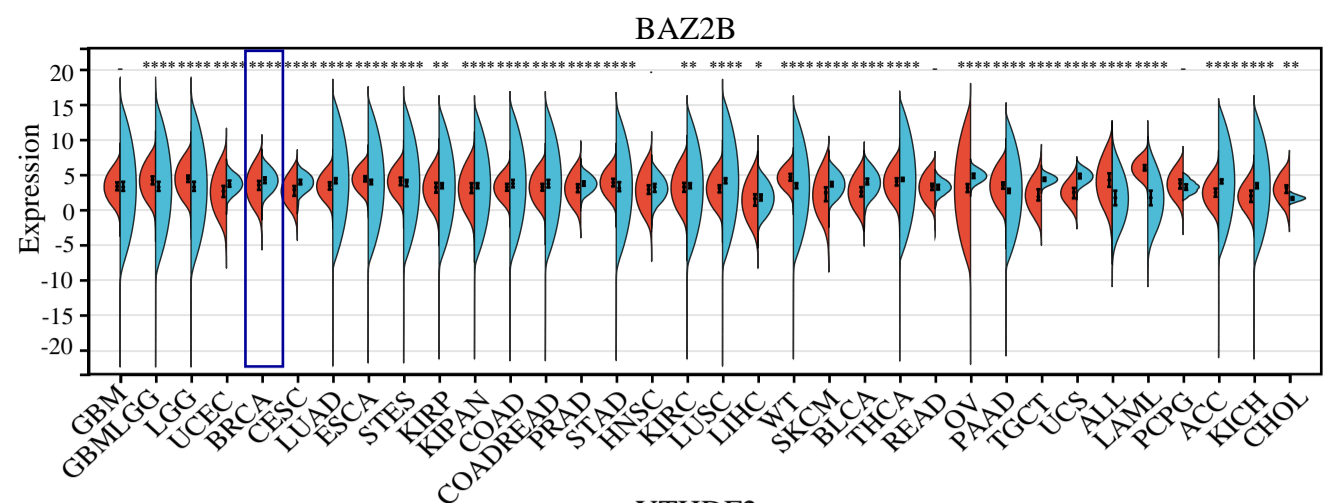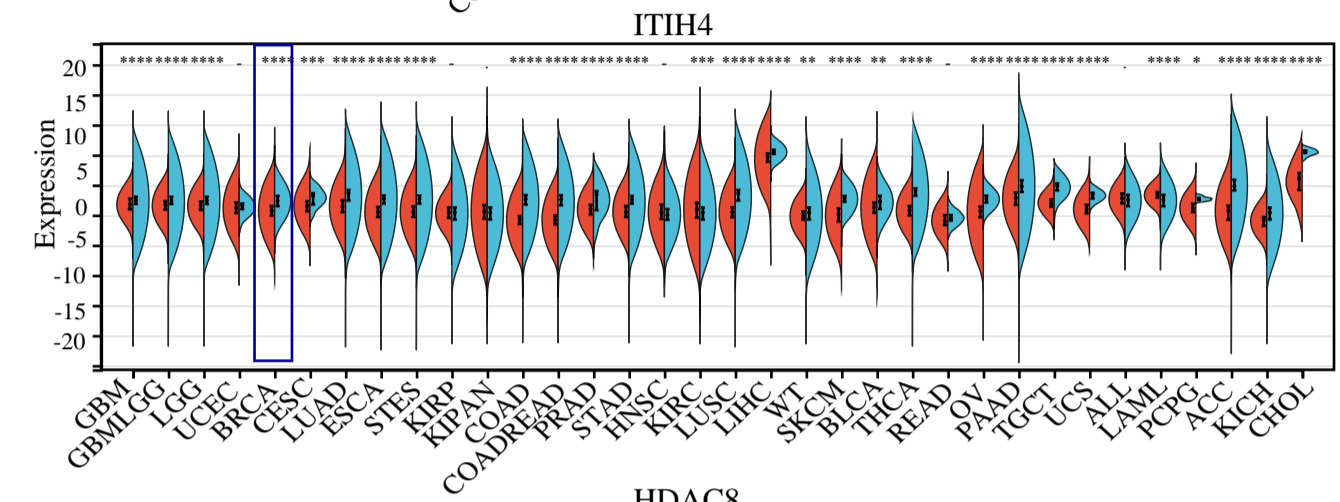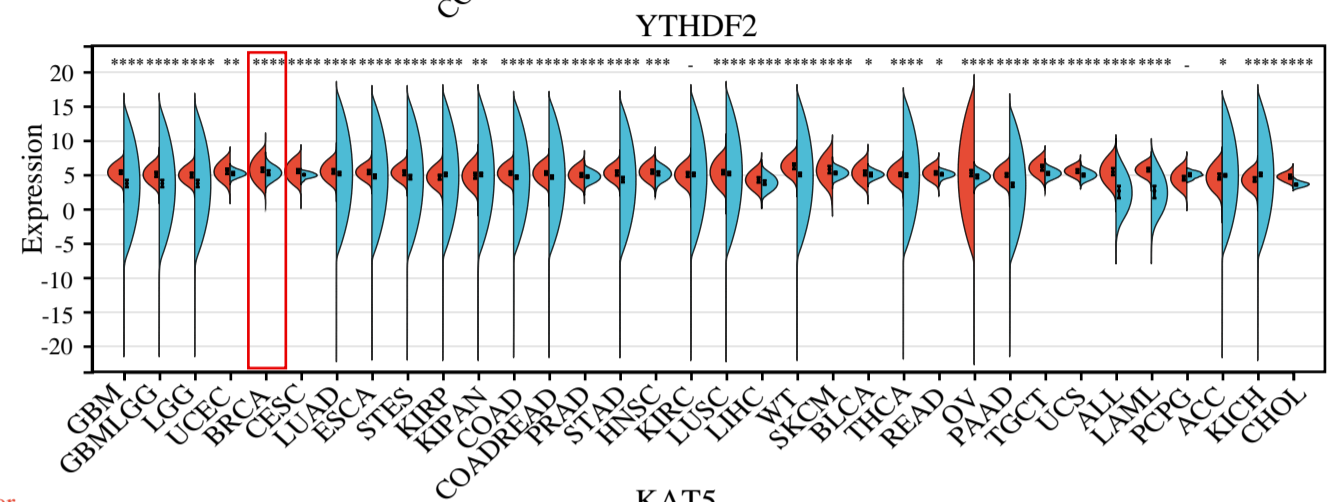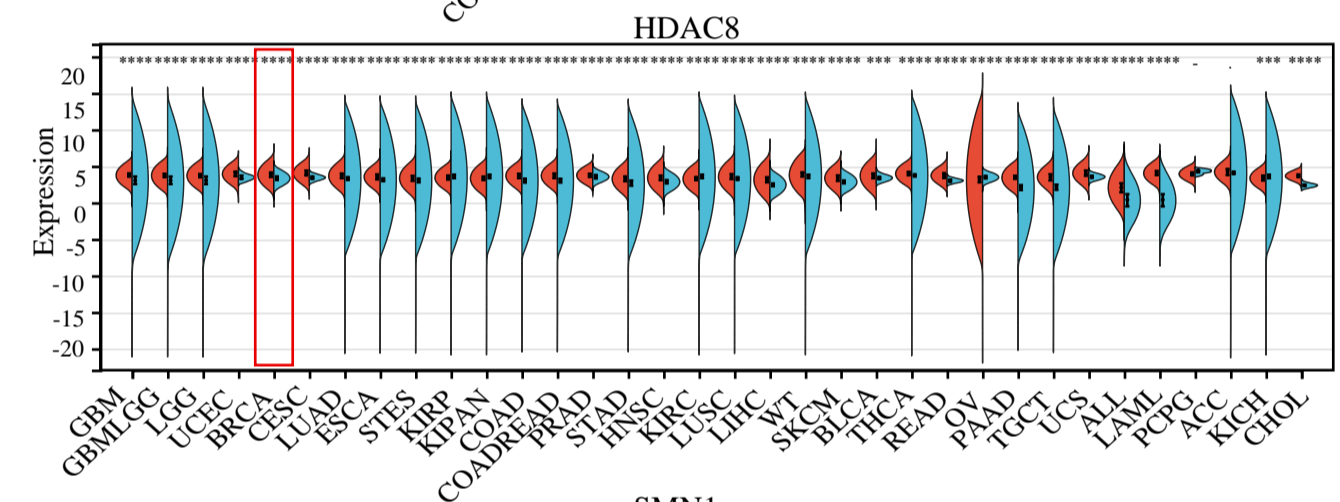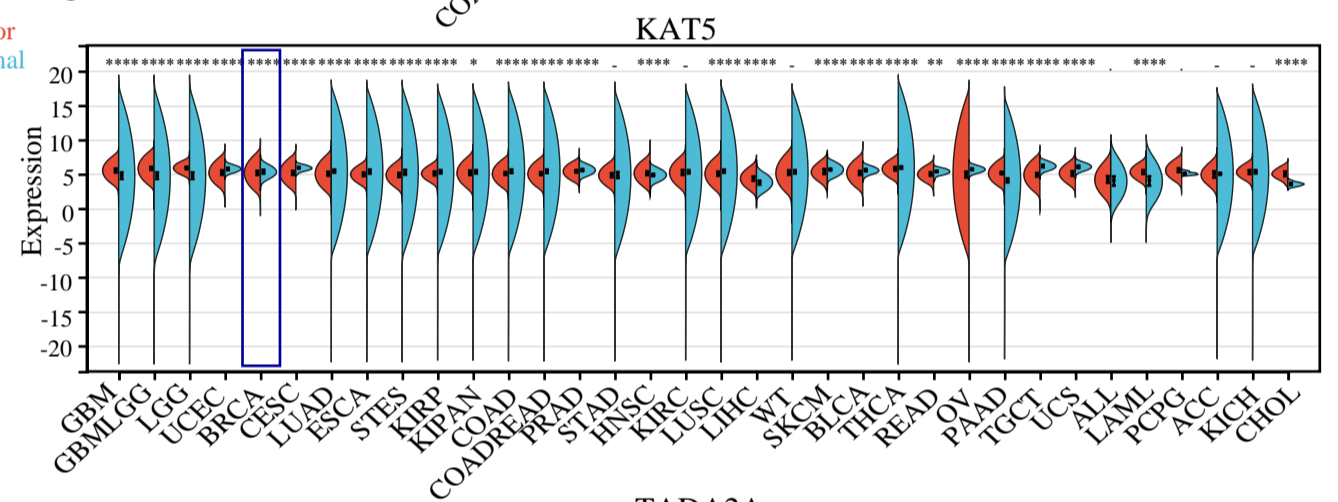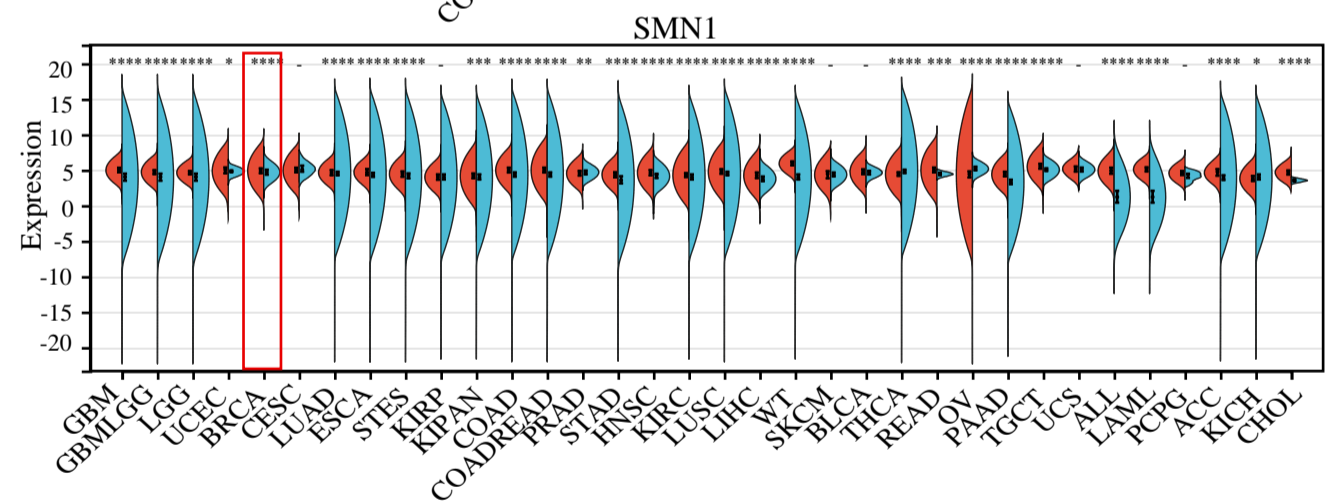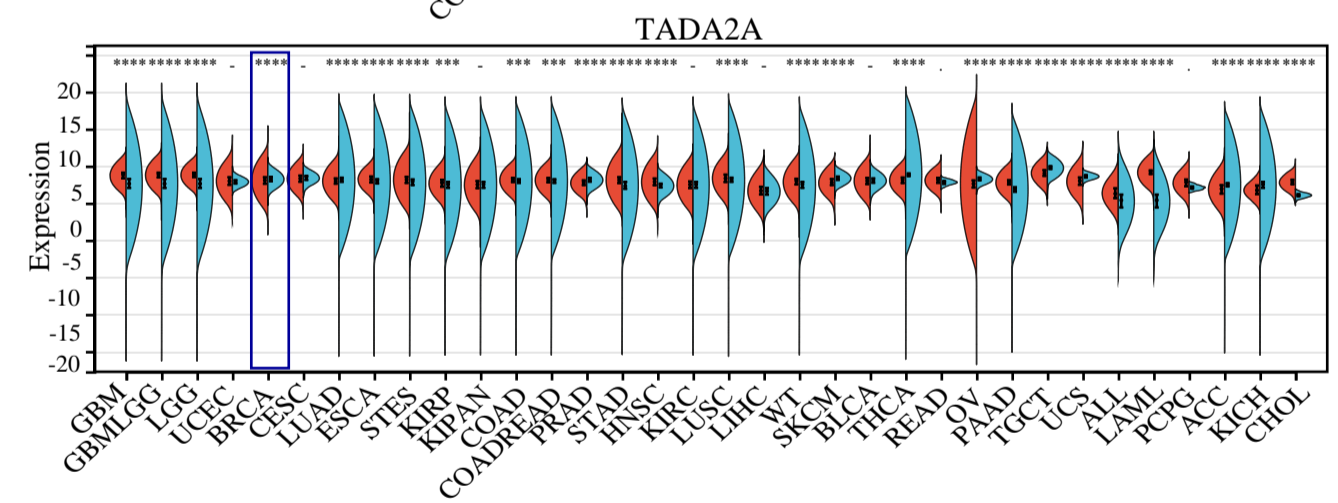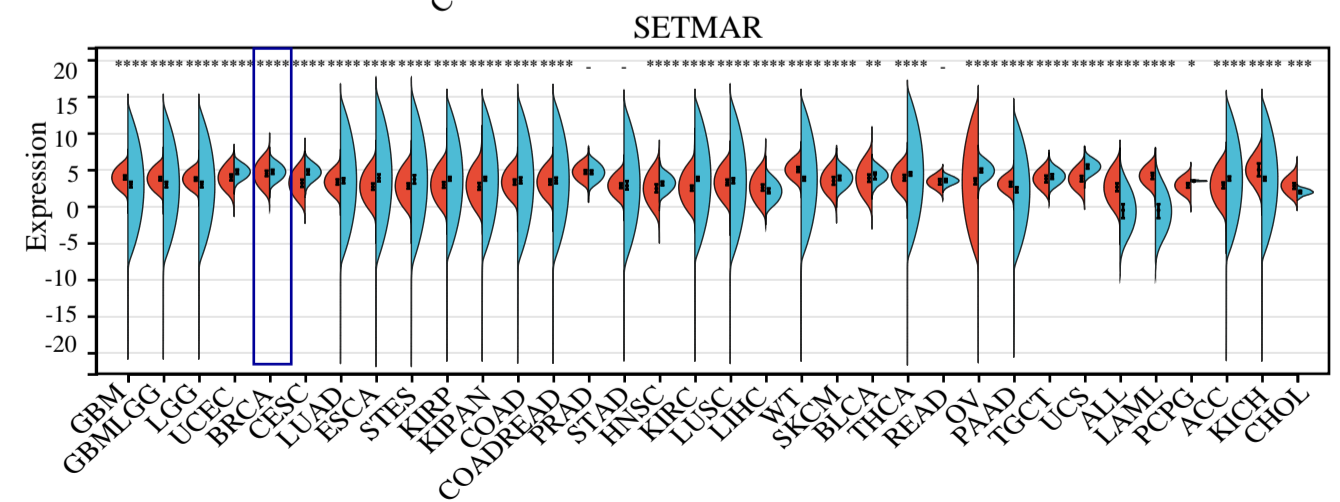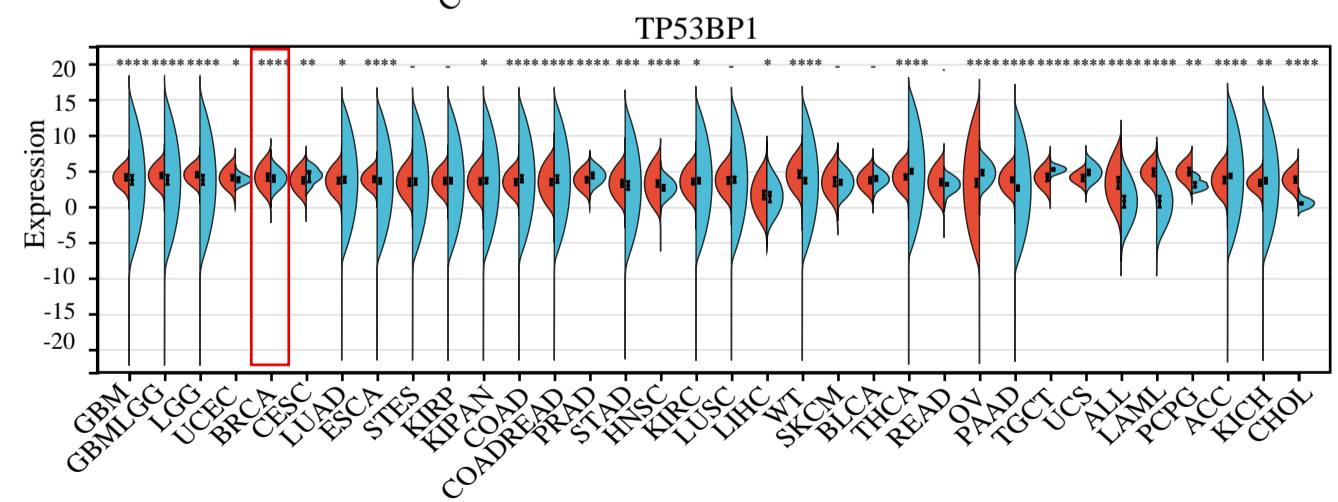

Group  
■ Tumor  
■ Normal

**Figure S5. Differentially expression of 10 master epigenetic regulators in pan-cancers.** The red is tumor sample, and the blue is normal sample. The differentially expression of 10 master epigenetic regulators in BRCA was highlighted by red box or blue box. The red box means that the master regulator was up-regulated in BRCA. And the blue box means that the master regulator was down-regulated in BRCA

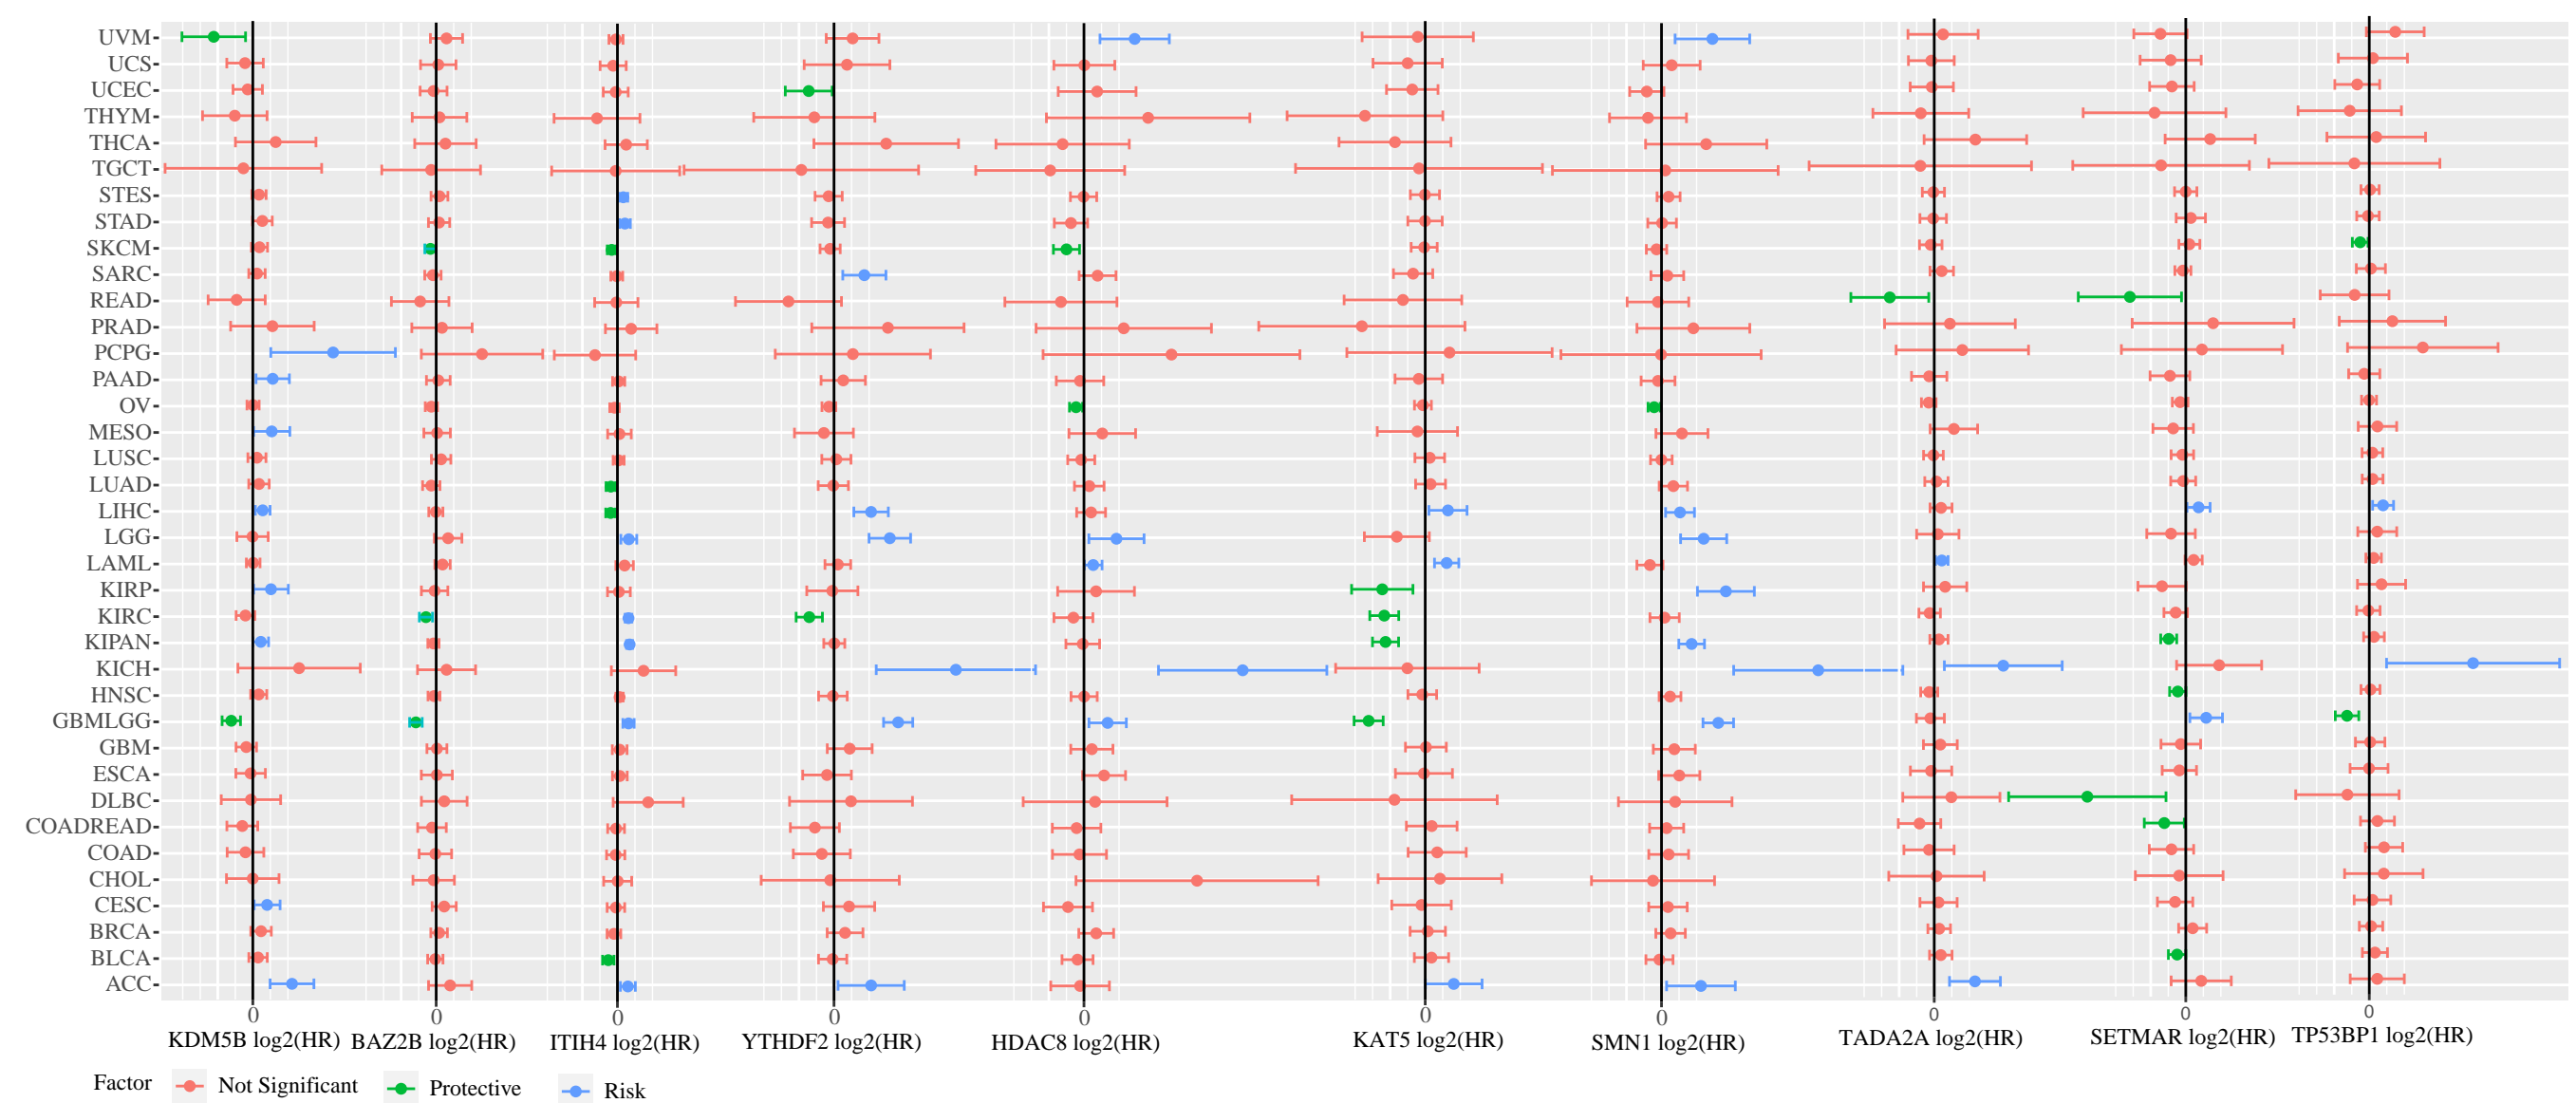

**Figure S6. Survival analysis for 10 master epigenetic regulators in pan-cancers.** The forest plots for 10 master epigenetic regulators in pan-cancer. The red means the epigenetic regulator has no significance for the survival of this cancer. The green means the epigenetic regulator is a protective factor for this cancer. And the blue means the epigenetic regulator is a risk factor for this cancer.
