# Supplementary material
Source: HighWire-hosted journal article supplement (https://www.cancerbiomed.org/content/21/1/83)
Supplement: media-7 [file media-7.xlsx]

## Sheet: Sheet1
Table S6. Differentially expressed information for 10 master epigenetic regulators in pan-cancers
Cancers	Description	KDM5B	BAZ2B	ITIH4	YTHDF2	HDAC8	KAT5	SMN1	TADA2A	SETMAR	ALKBH5
GBM	Glioblastoma multiforme	UP	-	DOWN	UP	UP	UP	UP	UP	UP	UP
GBMLGG	Glioma	UP	UP	DOWN	UP	UP	UP	UP	UP	UP	UP
LGG	Brain Lower Grade Glioma	UP	UP	DOWN	UP	UP	UP	UP	UP	UP	UP
UCEC	Uterine Corpus Endometrial Carcinoma	UP	DOWN	-	UP	UP	DOWN	UP	-	DOWN	DOWN
BRCA	Breast invasive carcinoma	UP	DOWN	DOWN	UP	UP	DOWN	UP	DOWN	DOWN	UP
CESC	Cervical squamous cell carcinoma and endocervical adenocarcinoma	-	DOWN	DOWN	UP	UP	DOWN	-	-	DOWN	-
LUAD	Lung adenocarcinoma	UP	DOWN	DOWN	UP	UP	DOWN	UP	DOWN	DOWN	-
ESCA	Esophageal carcinoma	UP	UP	DOWN	UP	UP	DOWN	UP	UP	DOWN	-
STES	Stomach and Esophageal carcinoma	UP	UP	DOWN	UP	UP	DOWN	UP	UP	DOWN	DOWN
KIRP	Kidney renal papillary cell carcinoma	-	DOWN	-	DOWN	DOWN	DOWN	-	UP	DOWN	-
KIPAN	Pan-kidney cohort (KICH+KIRC+KIRP)	-	DOWN	-	UP	DOWN	UP	UP	-	DOWN	UP
COAD	Colon adenocarcinoma	UP	DOWN	DOWN	UP	UP	DOWN	UP	UP	DOWN	DOWN
COADREAD	Colon adenocarcinoma/Rectum adenocarcinoma Esophageal carcinoma	UP	DOWN	DOWN	UP	UP	DOWN	UP	UP	DOWN	DOWN
PRAD	Prostate adenocarcinoma	UP	DOWN	DOWN	UP	UP	DOWN	DOWN	DOWN	-	-
STAD	Stomach adenocarcinoma	UP	UP	DOWN	UP	UP	-	UP	UP	-	UP
HNSC	Head and Neck squamous cell carcinoma	UP	-	-	UP	UP	UP	UP	UP	DOWN	UP
KIRC	Kidney renal clear cell carcinoma	UP	DOWN	UP	-	DOWN	-	UP	-	DOWN	UP
LUSC	Lung squamous cell carcinoma	UP	DOWN	DOWN	UP	UP	DOWN	UP	UP	DOWN	UP
LIHC	Liver hepatocellular carcinoma	UP	DOWN	DOWN	UP	UP	UP	UP	-	UP	UP
WT	High-Risk Wilms Tumor	UP	UP	DOWN	UP	UP	-	UP	UP	UP	UP
SKCM	Skin Cutaneous Melanoma	DOWN	DOWN	DOWN	UP	UP	DOWN	-	DOWN	DOWN	UP
BLCA	Bladder Urothelial Carcinoma	UP	DOWN	DOWN	UP	UP	DOWN	-	-	DOWN	DOWN
THCA	Thyroid carcinoma	-	DOWN	DOWN	UP	UP	DOWN	DOWN	DOWN	DOWN	-
READ	Rectum adenocarcinoma	UP	-	-	UP	UP	DOWN	UP	-	-	DOWN
OV	Ovarian serous cystadenocarcinoma	-	DOWN	DOWN	UP	DOWN	DOWN	DOWN	DOWN	DOWN	DOWN
PAAD	Pancreatic adenocarcinoma	UP	UP	DOWN	UP	UP	UP	UP	UP	UP	UP
TGCT	Testicular Germ Cell Tumors	DOWN	DOWN	DOWN	UP	UP	DOWN	UP	DOWN	DOWN	DOWN
UCS	Uterine Carcinosarcoma	UP	DOWN	DOWN	UP	UP	DOWN	-	DOWN	DOWN	DOWN
ALL	Acute Lymphoblastic Leukemia	UP	UP	-	UP	UP	-	UP	UP	UP	UP
LAML	Acute Myeloid Leukemia	UP	UP	UP	UP	UP	UP	UP	UP	UP	UP
PCPG	Pheochromocytoma and Paraganglioma	-	-	DOWN	-	-	-	-	-	DOWN	-
ACC	Adrenocortical carcinoma	DOWN	DOWN	DOWN	DOWN	-	-	UP	DOWN	DOWN	-
KICH	Kidney Chromophobe	DOWN	DOWN	DOWN	DOWN	DOWN	-	DOWN	DOWN	UP	DOWN
CHOL	Cholangiocarcinoma	UP	UP	DOWN	UP	UP	UP	UP	UP	UP	UP
